# Supplementary material for: Multilevel Growth Curve Analyses of Treatment Effects of a Web-Based Intervention for Stress Reduction: Randomized Controlled Trial
Source: J Med Internet Res. 2013 Apr 22;15(4):e84. doi: 10.2196/jmir.2570 (PMC3636659; doi:10.2196/jmir.2570)
Supplement: Supplementary file 1 [file jmir_v15i4e84_app1.pdf]

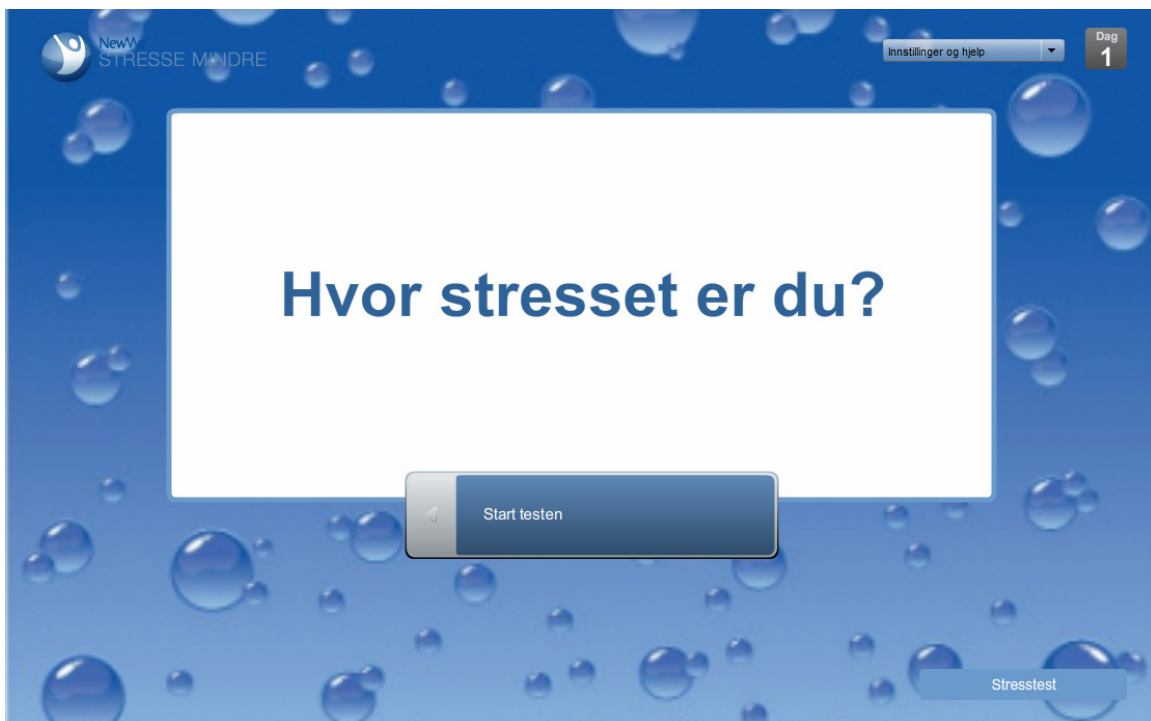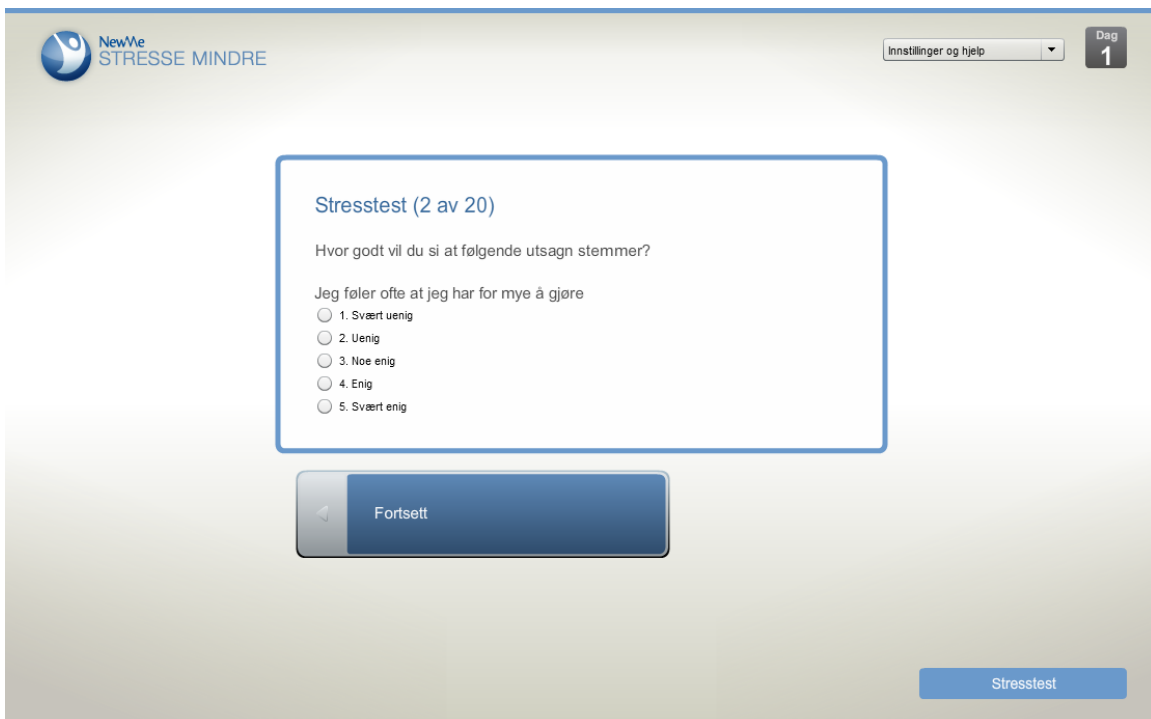

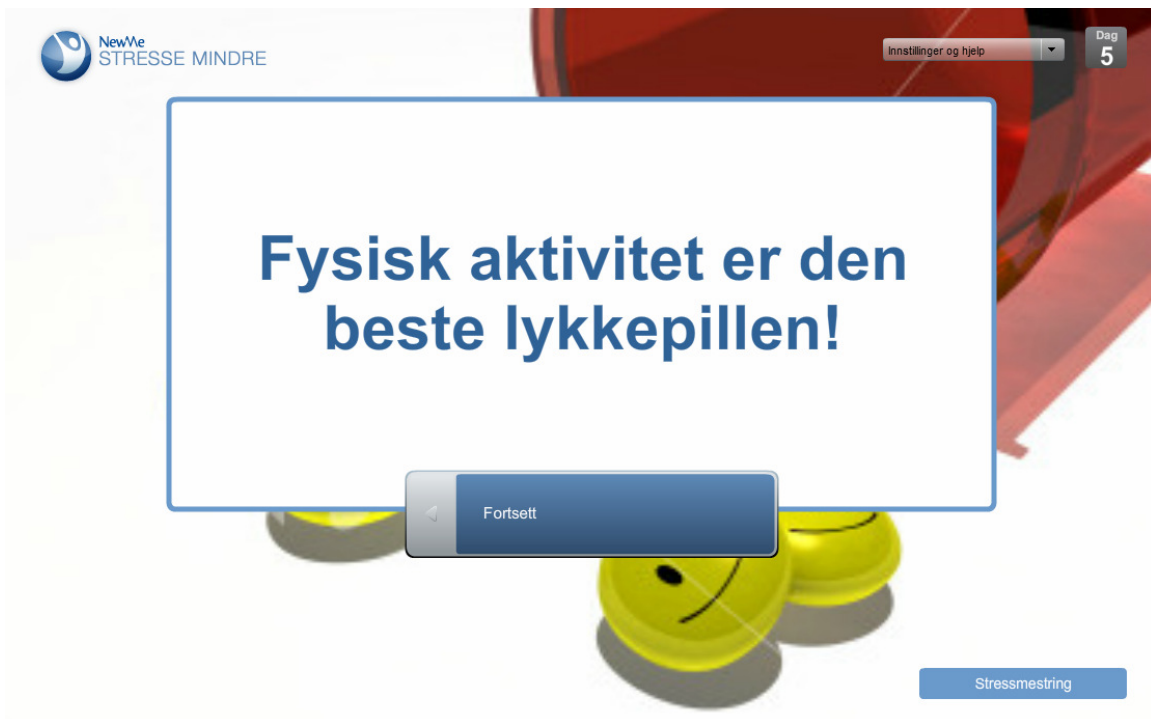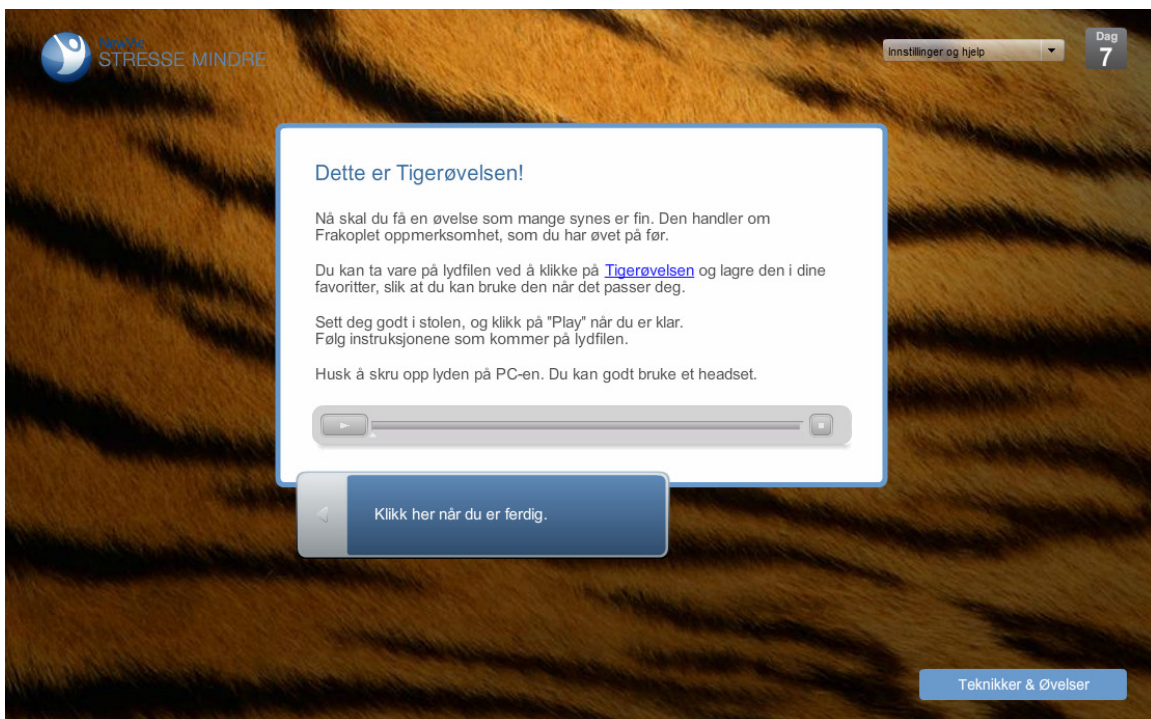

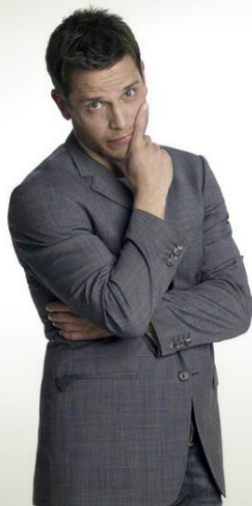

### Før du skal gjøre noe, hvor mye preges du vanligvis av dette?

1. Du tenker mye på belønningen, eller på "straffen" hvis du ikke leverer.
2. Du ser på oppgaven som kjedelig, ubehagelig, truende eller vanskelig.
3. Du overdriver ubehaget, og undervurderer belønningen.
4. Du gjør noe annet, dagdrømmer, surfer på nettet eller andre ting.
5. Du lover deg selv å gjøre det i morgen, men da har du en ny unnskyldning.
6. Du tenker at du jobber best under press, og må ha press for å få ting gjort.

Hvilke punkter kjente du deg best igjen i ?

- ☐ 1 eller 3 kjennetegner meg best
- ☒ 2 eller 4 kjennetegner meg best
- ☐ 5 eller 6 kjennetegner meg best

Klikk her når du har svart

Stressmestring

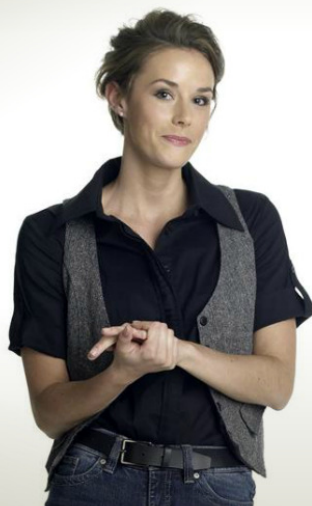

### Finne litt ro og lytte til kroppen din.

Når du prøver å lytte aktivt til det kroppen din sier, stopper du autopiloten. Da blir det lettere å stå i mot stresset også, og minke effekten.

Det gjør du ved å legge merke til stresset, anerkjenne at det er der og la det bli gradvis svekket av seg selv.

Da vil stresset bli mindre for hver gang. Til slutt vil det falme bort, slik at du ikke lenger bryr deg om det.

Det høres litt rart ut, men prøv. Du vil bli overrasket!

Det finnes en øvelse du kan bruke

Teknikker & Øvelser

### Kroppsscanning

Den tar ca. 10 minutter og gjøres helst liggende, på gulvet eller i sengen. Men du kan også sitte, hvis det ikke passer å ligge. Demp gjerne lyset litt.

Klikk på linken her [Kroppsscanning](#) og last ned øvelsen. Så kan du bruke den når det passer deg.

Sett på lyd på høyttalerne og klikk på "Play" når du er klar. Du må gjerne bruke et headset. Det kan ta litt tid før filen er lastet ferdig.

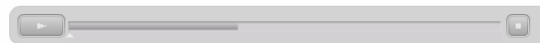

Klikk her når du er ferdig

Teknikker & Øvelser
